# Supplementary material for: Anisotropic elasticity of silicon and its application to the modelling of X-ray optics
Source: PubMed Central journal article supplement (PMC4861878; doi:10.1107/s1600577514004962), 2014-04-04
Supplement: s-21-00507-sup1.pdf [file s-21-00507-sup1.pdf]

## Matrix based computer algorithm and Matlab and Python codes for the calculation of anisotropic elasticity

For an arbitrary orientation of the cubic crystal with optical surface parallel to the (h k l) plane, the coordinate system ( $e_1, e_2, e_3$ ) is defined by the surface normal [h k l] and two other orthogonal vectors in the crystal surface. The three normalized vectors could be

$$e_1 = [h \ k \ l] / \sqrt{h^2 + k^2 + l^2}, \quad e_2 = [0 \ l \ -k] / \sqrt{k^2 + l^2}, \quad e_3 = [(k^2 + l^2) \ -h*k \ -h*l] / \sqrt{(k^2 + l^2) * (h^2 + k^2 + l^2)} \quad (a)$$

The formalism in (Wortman *et al.* 1965) can be used to calculate the stiffness coefficient matrix  $C_{hkl}$  and compliance matrix  $S_{hkl}$  for any silicon crystal plane. We have re-written this formalism in matrix form and coded in MatLab as follows:

$$\begin{aligned} \mu &= c_{11} - c_{12} - 2*c_{44}; \\ \mathbf{Ce} &= \text{zeros}(6,6); \quad \mathbf{Ce}(1,1) = \mu; \quad \mathbf{Ce}(2,2) = \mu; \quad \mathbf{Ce}(3,3) = \mu; \\ \mathbf{M}_0 &= [e_1 \cdot e_1; e_1 \cdot e_2; e_2 \cdot e_1; e_2 \cdot e_2; e_3 \cdot e_1; e_3 \cdot e_2; e_1 \cdot e_3; e_2 \cdot e_3; e_1 \cdot e_3; e_2 \cdot e_3]; \quad \mathbf{SM} = \mathbf{M}_0 \cdot \mathbf{M}_0'; \\ \mathbf{C} &= \mathbf{C}_{100} + \mu \cdot \mathbf{M} - \mathbf{Ce}; \end{aligned}$$

The compliant coefficient matrix  $\mathbf{S} = \mathbf{C}^{-1}$  can be used to calculate Young's modulus E, shear modulus G and Poisson's ratio  $\nu$  as:

$$\begin{aligned} \mathbf{S} &= \text{inv}(\mathbf{C}); \\ E &= [1/\mathbf{S}(1,1), 1/\mathbf{S}(2,2), 1/\mathbf{S}(3,3)]; \\ G &= [1/\mathbf{S}(4,4), 1/\mathbf{S}(5,5), 1/\mathbf{S}(6,6)]; \\ \nu &= -\mathbf{S}(1:3,1:3) ./ ([1/\mathbf{S}(1,1); 1/\mathbf{S}(2,2); 1/\mathbf{S}(3,3)] * \text{ones}(1,3)); \end{aligned}$$

Where E and G are vectors 1x3, represents  $E = [E_{11}, E_{22}, E_{33}]$ ,  $G = [G_{23}, G_{13}, G_{12}]$ . Poisson's ratio matrix  $\nu$  is of dimension 3x3, there are 9 elements but only the 6 elements  $\nu_{12}, \nu_{13}, \nu_{21}, \nu_{23}, \nu_{31}, \nu_{32}$  are used. In general, the Poisson's ratio matrix is not symmetric:  $\nu_{ij} \neq \nu_{ji}$ . Attention should be paid to the order of index in the Poisson's ratio.

When using finite element software ANSYS, the 6x6 stiffness coefficient matrix  $\mathbf{C}$  relates the terms ordered as {1, 2, 3, 12, 23, 31}, whereas for most published materials (Mason 1958, Wortman *et al.* 1965 for Silicon) the order is given as {1, 2, 3, 23, 31, 12}. This difference requires the  $\mathbf{C}$  matrix terms to be converted to the expected format. It is more convenient to generate directly the stiffness coefficient matrix  $\mathbf{C}$  in ANSYS convention by using following matrix  $\mathbf{M}_0$ :

$$\mathbf{M}_0 = \mathbf{M}_{0a} = [e_1 \cdot e_1; e_1 \cdot e_2; e_2 \cdot e_1; e_2 \cdot e_2; e_3 \cdot e_1; e_3 \cdot e_2; e_1 \cdot e_3; e_2 \cdot e_3; e_1 \cdot e_3; e_2 \cdot e_3];$$

The coordinate system in finite element modelling is often defined with z-axis normal to the crystal optical surface, and x-axis and y-axis parallel to the crystal optical surface. In that case, the vectors given in Eq.(a) need to be permuted as  $e_1 \rightarrow e_{3a}, e_2 \rightarrow e_{1a}, e_3 \rightarrow e_{2a}$ , and the matrix  $\mathbf{M}_0$  is then:

$$\mathbf{M}_0 = \mathbf{M}_{0a} = [e_{1a} \cdot e_{1a}; e_{1a} \cdot e_{2a}; e_{2a} \cdot e_{1a}; e_{2a} \cdot e_{2a}; e_{3a} \cdot e_{3a}; e_{3a} \cdot e_{1a}; e_{1a} \cdot e_{3a}; e_{3a} \cdot e_{2a}; e_{2a} \cdot e_{3a}; e_{1a} \cdot e_{3a}];$$

---

Matlab code for the calculation of anisotropic elasticity of silicon:

```
% Vectors e1,e2, e3 to be defined by user, for instance
h=3; k=1; l=1;
e1=[h k l]; e1=e1/norm(e1);
e2=[0 l -k]; e2=e2/norm(e2);
e3=[(k^2+l^2) -h*k -h*l]; e3=e3/norm(e3);

% Definition of Stiffness Matrix for Si(100)
c11 = 165.7 ; c12 = 63.9 ; c44 = 79.6; % GPa
C100=[c11 c12 c12 0 0 0; c12 c11 c12 0 0 0; c12 c12 c11 0 0 0; 0 0 0 c44 0 0; 0 0 0 0 c44 0; 0 0 0 0 0 c44];

mu= c11 -c12 -2*c44 ;
Ce = zeros(6,6) ; Ce(1,1)= mu; Ce(2,2)= mu; Ce(3,3)= mu;
M0 = [ e1.*e1; e2.*e2; e3.*e3; e2.*e3; e1.*e3; e1.*e2]; % Common definition
% M0 = [ e1.*e1; e2.*e2; e3.*e3; e1.*e2; e2.*e3; e1.*e3]; % ANSYS definition
M= M0*M0';
C = C100 + mu *M - Ce; % Stiffness Matrix (GPa)
S = inv(C); % Compliance coefficient Matrix
E = [1/S(1,1), 1/S(2,2), 1/S(3,3)]; % Young's modulus (GPa)
G = [1/S(4,4), 1/S(5,5), 1/S(6,6)]; % shear modulus (GPa)
nu = - S(1:3,1:3)./( [S(1,1); S(2,2); S(3,3)] *ones(1,3)); % Poisson's ratio Matrix
```

Python code using Numpy for the calculation of anisotropic elasticity of silicon:

```
import numpy as np
# Vectors e1,e2, e3 to be defined by user, for instance
h=3; k=1; l=1;
e1 = np.array([h, k, l]); e1 = e1/np.sqrt(np.dot(e1,e1))
e2 = np.array([0, l, -k]); e2 = e2/np.sqrt(np.dot(e2,e2))
e3 = np.array([(k*k+l*l), -h*k, -h*l]); e3 = e3/np.sqrt(np.dot(e3,e3))

# Definition of Stiffness Matrix for Si(100)
c11 = 165.7 ; c12 = 63.9 ; c44 = 79.6 # GPa
C100= np.array( [ [c11, c12, c12, 0, 0, 0],[c12, c11, c12, 0, 0, 0],[c12, c12, c11, 0, 0, 0],[0, 0, 0, c44, 0, 0],[0, 0, 0, 0, c44, 0],[0, 0, 0, 0, 0, c44]])

mu= c11 -c12 -2*c44 ;
# note that python indices start by zero
Ce=np.zeros((6,6)) ; Ce[0,0] = mu ; Ce[1,1] = mu ; Ce[2,2] = mu
M0 = np.array( [e1*e1, e2*e2, e3*e3, e2*e3, e1*e3, e1*e2] ) # Common definition
#M0 = np.array( [e1*e1, e2*e2, e3*e3, e1*e2, e2*e3, e3*e1] ) # ANSYS definition
M = np.dot( M0,M0.transpose() )
C=C100+mu*M-Ce # Stiffness matrix (GPa)
S = np.linalg.inv(C) # Compliance coefficient Matrix
E = [1/S[0,0], 1/S[1,1], 1/S[2,2]] # Young's modulus (GPa)
G = [1/S[3,3], 1/S[4,4], 1/S[5,5]] # shear modulus (GPa)
nu = -S[0:3,0:3] / np.array( [ [S[0,0],S[0,0],S[0,0]],[S[1,1],S[1,1],S[1,1]],[S[2,2],S[2,2],S[2,2]] ] ) # Poisson's ratio
```

---

---

**Stiffness Matrix of silicon for crystal orientations (100), (110), (111), (311)**

{1 2 3 23 31 12}

Common

{1 2 3 12 23 31}

ANSYS convention

Si (1 0 0)

$(e_1', e_2', e_3')$  [1 0 0], [0 1 0], [0 0 1]

[0 1 0], [0 0 1], [1 0 0]

$$C_{100} = \begin{bmatrix} 165.7 & 63.9 & 63.9 & & & \\ 63.9 & 165.7 & 63.9 & & & \\ 63.9 & 63.9 & 165.7 & & & \\ & & & 79.6 & & \\ & & & & 79.6 & \\ & & & & & 79.6 \end{bmatrix}$$

$$C_{100}^a = \begin{bmatrix} 165.7 & 63.9 & 63.9 & & & \\ 63.9 & 165.7 & 63.9 & & & \\ 63.9 & 63.9 & 165.7 & & & \\ & & & 79.6 & & \\ & & & & 79.6 & \\ & & & & & 79.6 \end{bmatrix}$$

Si (1 1 0)

$(e_1', e_2', e_3')$  [1 1 0], [0 0 1], [1 -1 0]

[0 0 1], [1 -1 0], [1 1 0]

$$C_{110} = \begin{bmatrix} 194.4 & 63.9 & 35.2 & & & \\ 63.9 & 165.7 & 63.9 & & & \\ 35.2 & 63.9 & 194.4 & & & \\ & & & 79.6 & & \\ & & & & 50.9 & \\ & & & & & 79.6 \end{bmatrix}$$

$$C_{110}^a = \begin{bmatrix} 165.7 & 63.9 & 63.9 & & & \\ 63.9 & 194.4 & 35.2 & & & \\ 63.9 & 35.2 & 194.4 & & & \\ & & & 79.6 & & \\ & & & & 50.9 & \\ & & & & & 79.6 \end{bmatrix}$$

Si (1 1 1)

$(e_1', e_2', e_3')$  [1 1 1], [0 1 -1], [2 -1 -1]

[0 1 -1], [2 -1 -1], [1 1 1]

$$C_{111} = \begin{bmatrix} 204 & 44.77 & 44.77 & 0 & 0 & 0 \\ 44.77 & 194.4 & 54.33 & 0 & 13.53 & 0 \\ 44.77 & 54.33 & 194.4 & 0 & -13.53 & 0 \\ 0 & 0 & 0 & 70.03 & 0 & 13.53 \\ 0 & 13.53 & -13.53 & 0 & 60.47 & 0 \\ 0 & 0 & 0 & 13.53 & 0 & 60.47 \end{bmatrix}$$

$$C_{111}^a = \begin{bmatrix} 194.4 & 54.33 & 44.77 & 0 & -13.53 & 0 \\ 54.33 & 194.4 & 44.77 & 0 & 13.53 & 0 \\ 44.77 & 44.77 & 204 & 0 & 0 & 0 \\ 0 & 0 & 0 & 70.03 & 0 & 13.53 \\ 13.53 & -13.53 & 0 & 0 & 60.47 & 0 \\ 0 & 0 & 0 & 13.53 & 0 & 60.47 \end{bmatrix}$$

Si (3 1 1)

$(e_1', e_2', e_3')$  [3 1 1], [0 1 -1], [2 -3 -3]

[0 1 -1], [2 -3 -3], [3 1 1]

$$C_{311} = \begin{bmatrix} 183.7 & 58.68 & 51.09 & & -16.1 & \\ 58.68 & 194.4 & 40.42 & & 11.07 & \\ 51.09 & 40.42 & 202 & & 5.032 & \\ & & & 56.12 & & 11.07 \\ -16.1 & 11.07 & 5.032 & & 66.79 & \\ & & & 11.07 & & 74.38 \end{bmatrix}$$

$$C_{311}^a = \begin{bmatrix} 194.4 & 40.42 & 58.68 & & 11.07 & \\ 40.42 & 202 & 51.09 & & 5.032 & \\ 58.68 & 51.09 & 183.7 & & -16.1 & \\ & & & 56.12 & & 11.07 \\ 11.07 & 5.032 & -16.1 & & 66.79 & \\ & & & 11.07 & & 74.38 \end{bmatrix}$$


---
